# Supplementary material for: A Nonhomogeneous Agent-Based Simulation Approach to Modeling the Spread of Disease in a Pandemic Outbreak
Source: Atypon-hosted journal article supplement (doi:10.1287/inte.1100.0550), 2011-06-01
Supplement: inte.1100.0550-sm-uupandemicnov24_appendix.pdf [file inte.1100.0550-sm-uupandemicnov24_appendix.pdf]

## Household Demographic Probabilities

| Household size    | Total number | Probability |
|-------------------|--------------|-------------|
| 1 person          | 412,450      | 0.2290      |
| 2 persons         | 489,105      | 0.2715      |
| 3 persons         | 320,940      | 0.1782      |
| 4 persons         | 338,385      | 0.1879      |
| 5 persons         | 151,335      | 0.0840      |
| 6 or more persons | 89,035       | 0.0494      |
| Total             | 1,801,250    | 1           |

**Table EC-1: Probabilities of household sizes are obtained from census data (Statistics Canada 2006a).**

| Age range         | Probability |
|-------------------|-------------|
| 0 to 4 years      | 0.0584      |
| 5 to 9 years      | 0.0610      |
| 10 to 14 years    | 0.0664      |
| 15 to 19 years    | 0.0665      |
| 20 to 24 years    | 0.0673      |
| 25 to 29 years    | 0.0679      |
| 30 to 34 years    | 0.0728      |
| 35 to 39 years    | 0.0806      |
| 40 to 44 years    | 0.0883      |
| 45 to 49 years    | 0.0811      |
| 50 to 54 years    | 0.0688      |
| 55 to 59 years    | 0.0595      |
| 60 to 64 years    | 0.0427      |
| 65 to 69 years    | 0.0343      |
| 70 to 74 years    | 0.0293      |
| 75 to 79 years    | 0.0243      |
| 80 to 84 years    | 0.0176      |
| 85 years and over | 0.0132      |

**Table EC-2: Probabilities of an individual being in an age range are obtained from census data (Statistics Canada 2006a).**

## Disease Transmission Data

| Age group of infectious person | Age group of susceptible person |         |         |           |
|--------------------------------|---------------------------------|---------|---------|-----------|
|                                | 0-4                             | 5-18    | 19-64   | $\geq 64$ |
| 0-4                            | 0.00059                         | 0.00062 | 0.00033 | 0.0008    |
| 5-18                           | 0.00058                         | 0.00061 | 0.00033 | 0.0008    |
| 19-64                          | 0.00057                         | 0.00053 | 0.00032 | 0.0008    |
| $\geq 64$                      | 0.00057                         | 0.00054 | 0.00029 | 0.00102   |

**Table EC-3:** The pandemic influenza transmission rates per minute used in the model are age-specific (Haber et al. 2007).

| Age group | 0-4 | 5-18 | 19-64 | $\geq 64$ |
|-----------|-----|------|-------|-----------|
| 0-4       | 120 | 60   | 120   | 60        |
| 5-18      | 60  | 120  | 120   | 60        |
| 19-64     | 120 | 120  | 120   | 120       |
| $\geq 64$ | 60  | 60   | 120   | 120       |

**Table EC-4:** The household contact times in minutes used in the model are age-specific (Haber et al. 2007).

| Age group | 0-4   | 5-18  | 19-64 | $\geq 64$ |
|-----------|-------|-------|-------|-----------|
| 0-4       | 2, 60 | 1, 30 | 0     | 0         |
| 5-18      | 1, 30 | 2, 60 | 0     | 0         |
| 19-64     | 0     | 0     | 2, 60 | 2, 60     |
| $\geq 64$ | 0     | 0     | 2, 60 | 2, 60     |

**Table EC-5:** The number of random contacts and time of each contact used in the model are age-specific (Haber et al. 2007).

## Table EC-6: Census Tract Probabilities

Probabilities of a household being located in a particular census tract (OID).

| OID  | Probability |
|------|-------------|------|-------------|------|-------------|------|-------------|------|-------------|------|-------------|
| 1800 | 0.0006014   | 1984 | 0.00056604  | 2169 | 0.0002793   | 2352 | 0.00077188  | 2540 | 0.00088904  | 2733 | 0.0014736   |
| 1801 | 0.00076173  | 1986 | 0.00093856  | 2170 | 0.00064239  | 2353 | 0.00082412  | 2541 | 0.00069553  | 2734 | 0.00086365  |
| 1802 | 0.00080126  | 1987 | 0.00082629  | 2171 | 0.0005664   | 2354 | 0.00088814  | 2542 | 0.00063713  | 2735 | 0.0013198   |
| 1803 | 0.0011854   | 1988 | 0.00067086  | 2172 | 0.0012044   | 2355 | 0.00059378  | 2543 | 0.0013125   | 2736 | 0.0012641   |
| 1804 | 0.00084388  | 1989 | 0.0010073   | 2173 | 0.0011549   | 2356 | 0.00075919  | 2544 | 0.00043763  | 2737 | 0.00085132  |
| 1805 | 0.0011874   | 1990 | 0.0011868   | 2174 | 0.00085495  | 2357 | 0.0011154   | 2545 | 0.00067449  | 2738 | 0.00072999  |
| 1806 | 0.00055588  | 1991 | 0.00074577  | 2175 | 0.00046683  | 2358 | 0.00035565  | 2546 | 0.0010833   | 2739 | 0.0010847   |
| 1807 | 0.00073906  | 1992 | 0.00067667  | 2176 | 0.0008408   | 2359 | 0.00096884  | 2547 | 0.0010847   | 2740 | 0.0014534   |
| 1808 | 0.00074595  | 1993 | 0.00049004  | 2177 | 0.00072745  | 2360 | 0.0010153   | 2548 | 0.001302    | 2741 | 0.0015367   |
| 1809 | 0.00065019  | 1994 | 0.0009527   | 2178 | 0.00044779  | 2361 | 0.0013383   | 2549 | 0.00069081  | 2742 | 0.0011364   |
| 1810 | 0.00097646  | 1995 | 0.00049313  | 2179 | 0.00084515  | 2362 | 0.00096957  | 2550 | 0.00091099  | 2743 | 0.0011602   |
| 1811 | 0.00064801  | 1996 | 0.00096903  | 2180 | 0.0010543   | 2363 | 0.00096467  | 2551 | 0.0010978   | 2744 | 0.0012436   |
| 1812 | 0.00047735  | 1997 | 0.00084679  | 2181 | 0.00089666  | 2364 | 0.00096195  | 2552 | 0.0004623   | 2745 | 0.001686    |
| 1813 | 0.0008321   | 1998 | 0.00075846  | 2182 | 0.00071747  | 2365 | 0.0012066   | 2563 | 0.0006005   | 2746 | 0.0011863   |
| 1814 | 0.00060557  | 1999 | 0.00031811  | 2183 | 0.00078005  | 0    | 0           | 2564 | 0.00087018  | 2747 | 0.0014627   |
| 1815 | 0.00080126  | 2000 | 0.00065237  | 2184 | 0.00089322  | 2366 | 0.0013738   | 2565 | 0.00098843  | 2748 | 0.0013586   |
| 1816 | 0.00096358  | 2001 | 0.00080961  | 2185 | 0.00079473  | 2367 | 0.0012362   | 2566 | 0.0012871   | 2749 | 0.0019166   |
| 1817 | 0.00047209  | 2002 | 0.00025209  | 2186 | 0.00099822  | 2368 | 0.00089068  | 2567 | 0.001039    | 2750 | 0.0011119   |
| 1818 | 0.00063151  | 2003 | 0.00037252  | 2187 | 0.0011123   | 2369 | 0.00067957  | 2568 | 0.00046919  | 2751 | 0.0037252   |
| 1819 | 0.00098807  | 2004 | 0.0010133   | 2188 | 0.0011294   | 2370 | 0.00099877  | 2569 | 0.0009255   | 2752 | 0.0029671   |
| 1820 | 0.00049784  | 2005 | 0.00039973  | 2189 | 0.00074305  | 2371 | 0.00073053  | 2570 | 0.00062244  | 2753 | 0.0026485   |
| 1821 | 0.0010247   | 2006 | 0.00096485  | 2190 | 0.0013357   | 2372 | 0.00068918  | 2571 | 0.00086637  | 2754 | 0.0015396   |
| 1822 | 0.0007844   | 2007 | 0.00081142  | 2191 | 0.00074196  | 2373 | 0.0011758   | 2572 | 0.0010167   | 2755 | 0.00070496  |
| 1823 | 0.00096141  | 2008 | 0.00070859  | 2192 | 0.0012641   | 2374 | 0.00084207  | 2573 | 0.00047191  | 2756 | 0.00040771  |
| 1824 | 0.0010693   | 2009 | 0.00091842  | 2193 | 0.0013236   | 2375 | 0.00053103  | 2574 | 0.00064928  | 2757 | 0.001102    |
| 1825 | 0.0011257   | 2010 | 0.0011243   | 2194 | 0.001109    | 2376 | 0.0011571   | 2575 | 0.00059143  | 2758 | 0.00097864  |
| 1826 | 0.00044543  | 2011 | 0.00085295  | 2195 | 0.00070823  | 2377 | 0.00066198  | 2576 | 0.00089702  | 2759 | 0.0013109   |
| 1827 | 0.00089068  | 2013 | 0.00088977  | 2196 | 0.00079836  | 2378 | 0.00089104  | 2577 | 0.0005644   | 2760 | 0.00093783  |
| 1828 | 0.00078295  | 2014 | 0.00067467  | 2197 | 0.00099768  | 2379 | 0.00059759  | 2578 | 0.0010205   | 2761 | 0.00063114  |
| 1829 | 0.00077388  | 2015 | 0.00096721  | 2198 | 0.00082357  | 2380 | 0.0012561   | 2579 | 0.0009012   | 2762 | 0.001084    |
| 1830 | 0.00084588  | 2016 | 0.00099079  | 2199 | 0.0012942   | 2381 | 0.0010998   | 2580 | 0.00084153  | 2763 | 0.00074686  |
| 1831 | 0.0010089   | 2017 | 0.0012389   | 2200 | 0.00056857  | 2382 | 0.00073307  | 2581 | 0.0012171   | 2764 | 0.00099043  |
| 1832 | 0.00088904  | 2018 | 0.00049131  | 2201 | 0.00068356  | 2383 | 0.001137    | 2582 | 0.0012197   | 2765 | 0.00050437  |
| 1833 | 0.001039    | 2019 | 0.001014    | 2202 | 0.0013201   | 2384 | 0.0012951   | 2583 | 0.0011424   | 2766 | 0.0010662   |
| 1834 | 0.0011859   | 2020 | 0.00091371  | 2203 | 0.0011736   | 2385 | 0.0011919   | 2584 | 0.00064729  | 2767 | 0.00099442  |
| 1835 | 0.00078984  | 2021 | 0.00071348  | 2204 | 0.0013954   | 2386 | 0.0041213   | 2585 | 0.00071729  | 2773 | 0.001176    |
| 1836 | 0.0007873   | 2022 | 0.0011315   | 2205 | 0.0007552   | 2387 | 0.0010009   | 2586 | 0.00044144  | 2774 | 0.0013203   |

|      |            |      |            |      |            |      |            |      |            |      |            |
|------|------------|------|------------|------|------------|------|------------|------|------------|------|------------|
| 1837 | 0.00091679 | 2023 | 0.00056422 | 2206 | 0.00080072 | 2388 | 0.00097338 | 2587 | 0.0010867  | 2775 | 0.00072618 |
| 1838 | 0.000615   | 2024 | 0.0011778  | 2207 | 0.00065345 | 2389 | 0.00073851 | 2588 | 0.00080961 | 2776 | 0.00089848 |
| 1839 | 0.00070786 | 2025 | 0.00045577 | 2208 | 0.00085096 | 2390 | 0.0011707  | 2589 | 0.0007523  | 2777 | 0.00082611 |
| 1840 | 0.00055878 | 2026 | 0.00072564 | 2209 | 0.00095252 | 2391 | 0.00066778 | 2590 | 0.0010615  | 2778 | 0.00044652 |
| 1841 | 0.00039428 | 2027 | 0.00079075 | 2210 | 0.00078476 | 2393 | 0.00098354 | 2591 | 0.00090718 | 2779 | 0.00038939 |
| 1842 | 0.00056531 | 2028 | 0.00097719 | 2211 | 0.00078422 | 2394 | 0.00039156 | 2592 | 0.0010436  | 2780 | 0.00094345 |
| 1843 | 0.00049059 | 2029 | 0.00072727 | 2212 | 0.00083482 | 2395 | 0.00066234 | 2593 | 0.001098   | 2781 | 0.00053829 |
| 1844 | 0.00080271 | 2030 | 0.00068374 | 2213 | 0.00095252 | 2396 | 0.00062969 | 2594 | 0.0011388  | 2782 | 0.00046066 |
| 1845 | 0.0013392  | 2031 | 0.00079473 | 2214 | 5.586e-05  | 2397 | 0.00078313 | 2595 | 0.00088161 | 2783 | 0.00049675 |
| 1846 | 0.00077624 | 2032 | 0.00084896 | 2215 | 0.0011638  | 2398 | 0.0010675  | 2596 | 0.001121   | 2784 | 0.0011943  |
| 1847 | 0.0007659  | 2033 | 0.0010671  | 2216 | 0.0010951  | 2399 | 0.0023619  | 2597 | 0.0013087  | 2785 | 0.00065998 |
| 1848 | 0.00040317 | 2034 | 0.0006121  | 2217 | 0.0007951  | 2400 | 0.0011689  | 2598 | 0.00091026 | 2786 | 0.00058871 |
| 1849 | 0.0011366  | 2035 | 0.0010251  | 2218 | 0.0018231  | 2401 | 0.00057311 | 2599 | 0.0018738  | 2787 | 0.00089485 |
| 1850 | 0.0003571  | 2037 | 0.00046846 | 2219 | 0.0015162  | 2402 | 0.00035729 | 2600 | 0.00093801 | 2788 | 9.2495e-06 |
| 1851 | 0.00078657 | 2038 | 0.00049349 | 2220 | 0.000506   | 2403 | 0.00055733 | 2601 | 0.00067032 | 2789 | 0.0011562  |
| 1852 | 0.0011069  | 2039 | 0.00067195 | 2221 | 0.00088941 | 2404 | 0.0006199  | 2602 | 0.00068646 | 2790 | 0.0011147  |
| 1853 | 0.0011624  | 2040 | 0.00087145 | 2222 | 0.00065182 | 2405 | 0.0004846  | 2603 | 0.0011682  | 2791 | 0.0013551  |
| 1854 | 0.0013156  | 2041 | 0.00060485 | 2223 | 0.0011705  | 2406 | 0.0013849  | 2604 | 0.00055842 | 2792 | 0.00098553 |
| 1855 | 0.0012726  | 2042 | 0.0012598  | 2224 | 0.0011542  | 2407 | 0.0011546  | 2605 | 0.0012802  | 2793 | 0.0016725  |
| 1856 | 0.0011061  | 2043 | 0.00095542 | 2225 | 0.00068864 | 2408 | 0.0013425  | 2606 | 0.0010343  | 2794 | 9.4309e-06 |
| 1857 | 0.0015612  | 2044 | 0.00079328 | 2226 | 0.0010087  | 2409 | 0.0010142  | 2607 | 0.00079909 | 2795 | 0.0010907  |
| 1858 | 0.00059342 | 2045 | 0.0011464  | 2227 | 0.00086474 | 2410 | 0.0011665  | 2608 | 0.00075157 | 2796 | 0.0012717  |
| 1859 | 0.00098354 | 2046 | 0.00077315 | 2228 | 0.0006783  | 2411 | 0.00085041 | 2609 | 0.0013156  | 2797 | 0.0007347  |
| 1860 | 0.00079455 | 2047 | 0.00073615 | 2229 | 0.0005615  | 2412 | 0.00098426 | 2610 | 0.00086383 | 2798 | 0.00081414 |
| 1861 | 0.00064964 | 2048 | 0.00032446 | 2230 | 0.00065382 | 2413 | 0.0014252  | 2611 | 0.000872   | 2799 | 0.00028855 |
| 1862 | 0.000582   | 2049 | 0.0010162  | 2231 | 0.00052614 | 2414 | 0.00064602 | 2612 | 0.0010082  | 2800 | 0.0020984  |
| 1863 | 0.00057275 | 2050 | 0.00099387 | 2232 | 0.0011005  | 0    | 0          | 2613 | 0.00053103 | 2801 | 0.0022435  |
| 1864 | 0.00082811 | 2051 | 0.00064547 | 2233 | 0.00083609 | 2415 | 0.00095035 | 2614 | 0.00089412 | 2802 | 0.00076535 |
| 1865 | 0.00086456 | 2052 | 0.0013056  | 2234 | 0.0013911  | 2416 | 0.00077896 | 2615 | 0.0018773  | 2803 | 0.00072291 |
| 1866 | 0.00062552 | 2053 | 0.00062389 | 2235 | 0.00082666 | 2417 | 0.00064185 | 2616 | 0.0021495  | 2804 | 0.00075212 |
| 1867 | 0.00090918 | 2054 | 0.00072781 | 2236 | 0.00076318 | 2418 | 0.0013363  | 2617 | 0.0016054  | 2805 | 0.00059777 |
| 1868 | 0.00077914 | 2055 | 0.00045577 | 2237 | 0.0018911  | 2419 | 0.00095488 | 2618 | 0.0018786  | 2806 | 0.00071457 |
| 1869 | 0.00081178 | 2056 | 0.00063241 | 2238 | 0.0024486  | 2420 | 0.00132    | 2619 | 0.0003085  | 2807 | 7.9075e-05 |
| 1870 | 0.0006569  | 2057 | 0.0012269  | 2239 | 0.0015113  | 2421 | 0.0014349  | 2620 | 0.00079111 | 2808 | 0.0011197  |
| 1871 | 0.00086819 | 2058 | 0.000981   | 2240 | 0.00075882 | 2422 | 0.0011712  | 2621 | 0.00069553 | 2809 | 0.0010579  |
| 1872 | 0.00092713 | 2059 | 0.0012316  | 2241 | 0.0010314  | 2423 | 0.0015167  | 2622 | 0.0010301  | 2810 | 0.0021167  |
| 1874 | 0.00010356 | 2060 | 0.00077551 | 2242 | 0.00062697 | 2424 | 0.00052051 | 2623 | 0.0012451  | 2811 | 0.00050111 |
| 1875 | 0          | 2061 | 0.0012793  | 2243 | 0.00091969 | 2425 | 0.0015878  | 2624 | 0.00068864 | 2812 | 0.0010671  |
| 1876 | 0.0012443  | 2062 | 0.00080181 | 2244 | 0.0010818  | 2426 | 0.00066035 | 2625 | 0.0019     | 2813 | 0.0011165  |
| 1877 | 0.00092296 | 2063 | 0.00065835 | 2245 | 0.00048333 | 2427 | 0.00047681 | 2626 | 0.00084098 | 2814 | 0.00062661 |
| 1878 | 2.8293e-05 | 2064 | 0.000944   | 2246 | 0.0012788  | 2428 | 0.00057257 | 2627 | 0.0010309  | 2815 | 0.00099768 |
| 1879 | 0.00065563 | 2065 | 0.0011705  | 2247 | 0.0011634  | 2429 | 0.00057438 | 2628 | 0.0010058  | 2816 | 0.00012315 |

|      |            |      |            |      |            |      |            |      |            |      |            |
|------|------------|------|------------|------|------------|------|------------|------|------------|------|------------|
| 1880 | 0.00095978 | 2066 | 0.00087798 | 2248 | 0.00073343 | 2430 | 0.00096195 | 2629 | 0.00065291 | 2817 | 0.0010561  |
| 1881 | 0.00069299 | 2067 | 0.00069245 | 2249 | 0.00067358 | 2431 | 0.00039755 | 2630 | 0.00095905 | 2818 | 0.00058544 |
| 1882 | 0.00076499 | 2068 | 0.0012619  | 2250 | 0.0011201  | 2432 | 0.0010913  | 2631 | 0.0011943  | 2819 | 0.0013874  |
| 1883 | 0.0011832  | 2069 | 0.00084116 | 2251 | 0.0011038  | 2433 | 0.00038812 | 2632 | 0.00074704 | 2820 | 0.00056495 |
| 1884 | 0.00084189 | 2070 | 0.00038304 | 2252 | 0.00066941 | 2434 | 0.0012247  | 2633 | 0.00090537 | 2821 | 0.0007902  |
| 1885 | 0.0014605  | 2071 | 0.00058345 | 2253 | 0.0006121  | 2435 | 0.00065363 | 2634 | 0.0010755  | 2822 | 0.00049331 |
| 1886 | 0.0011453  | 2072 | 0.00035982 | 2254 | 0.0005878  | 2436 | 0.00058308 | 2635 | 0.0010922  | 2823 | 0.0014912  |
| 1887 | 9.9387e-05 | 2073 | 0.0009498  | 2255 | 0.0010046  | 2437 | 0.0016604  | 2636 | 0.00084824 | 2824 | 0.0011021  |
| 1888 | 0.0004973  | 2074 | 0.0014794  | 2256 | 0.00092332 | 2438 | 0.0014607  | 2637 | 0.00065382 | 2825 | 0.00053067 |
| 1889 | 0.00081323 | 2075 | 0.00081106 | 2257 | 0.0007523  | 2439 | 0.0009819  | 2638 | 0.00065255 | 2826 | 0.0012599  |
| 1890 | 0.0011567  | 2076 | 0.00075701 | 2258 | 0.00062044 | 2440 | 0.00077043 | 2639 | 0.00078712 | 2827 | 0.0011043  |
| 1891 | 0.00029435 | 2077 | 0.00016976 | 2259 | 0.00067667 | 2441 | 0.00047082 | 2640 | 0.0011266  | 2828 | 0.00071784 |
| 1892 | 0.0005956  | 2078 | 0.00052976 | 2260 | 0.0010182  | 2442 | 0.0016466  | 2641 | 0.00056803 | 2829 | 0.00045957 |
| 1893 | 0.00037361 | 2079 | 0.00084733 | 2261 | 0.0007075  | 2443 | 0.001121   | 2642 | 0.00080852 | 2830 | 0.0008836  |
| 1894 | 0.00091371 | 2080 | 0.0009975  | 2262 | 0.0010202  | 2444 | 0.0034385  | 2643 | 0.0010189  | 2831 | 0.00068755 |
| 1895 | 0.00068791 | 2081 | 0.00050854 | 2263 | 0.00082593 | 2445 | 0.0008243  | 2644 | 0.00093529 | 2832 | 0.0010541  |
| 1896 | 0.0005635  | 2082 | 0.00090192 | 2264 | 0.00074468 | 2446 | 0.0013201  | 2645 | 0.0010704  | 2833 | 0.00073724 |
| 1897 | 0.001164   | 2083 | 0.0011284  | 2265 | 0.00064094 | 2447 | 0.00073035 | 2646 | 0.0010982  | 2834 | 0.00094944 |
| 1898 | 0.00056368 | 2084 | 0.0013882  | 2266 | 0.0012697  | 2448 | 0.0011966  | 2647 | 0.00078476 | 2835 | 0.00096377 |
| 1899 | 0.0011798  | 2085 | 0.0011645  | 2267 | 0.00066941 | 2449 | 0.00072455 | 2648 | 0.0009226  | 2836 | 0.0010234  |
| 1900 | 0.00083536 | 2086 | 0.00078966 | 2268 | 0.0010327  | 2450 | 0.00076971 | 2649 | 0.00084515 | 2837 | 0.0011444  |
| 1901 | 0.0010222  | 2087 | 0.00029417 | 2269 | 0.00042258 | 2451 | 0.00075012 | 2650 | 0.00065799 | 2838 | 0.0010584  |
| 1902 | 0.0010713  | 2088 | 0.00057057 | 2270 | 0.0011727  | 2452 | 0.000761   | 2651 | 0.0009741  | 2839 | 0.0013065  |
| 1903 | 0.0008252  | 2089 | 0.00079274 | 2271 | 0.00071838 | 2453 | 0.00060267 | 2652 | 0.0013062  | 2840 | 0.0012612  |
| 1904 | 0.0010586  | 2090 | 3.5729e-05 | 2272 | 0.00083373 | 2454 | 0.0013448  | 2653 | 0.0014297  | 2841 | 0.0005936  |
| 1905 | 0.00099188 | 2091 | 0.00069662 | 2273 | 0.00099115 | 2455 | 0.0011975  | 2654 | 0.0012607  | 2842 | 0.000691   |
| 1906 | 0.0010026  | 2092 | 0.001049   | 2274 | 0.00069988 | 2456 | 0.00037379 | 2655 | 0.00087453 | 2843 | 0.00073035 |
| 1907 | 0.0014944  | 2093 | 0.00042167 | 2275 | 0.00073217 | 2457 | 0.00096268 | 2656 | 0.0011036  | 2844 | 0.0014433  |
| 1908 | 0.00083772 | 2094 | 0.00068175 | 2276 | 0.0013894  | 2458 | 0.0010827  | 2657 | 0.00063368 | 2845 | 0.00086891 |
| 1909 | 0.00081704 | 2095 | 0.00051072 | 2277 | 0.00070133 | 2459 | 0.0019411  | 2658 | 0.0021278  | 2846 | 0.00097973 |
| 1910 | 0.0008165  | 2096 | 0.0011995  | 2278 | 0.0010144  | 2460 | 0.00082883 | 2659 | 0.00081015 | 2847 | 0.00091371 |
| 1911 | 0.0006783  | 2097 | 0.0011359  | 2279 | 0.00069607 | 2461 | 0.00037579 | 2660 | 0.00089811 | 2848 | 0.0010855  |
| 1912 | 0.00078984 | 2098 | 0.00097809 | 2280 | 0.0012304  | 2462 | 0.0011669  | 2661 | 0.0011829  | 2849 | 0.00073833 |
| 1913 | 0.00086601 | 2099 | 0.00084171 | 2281 | 0.00075429 | 2463 | 0.0030558  | 2662 | 0.0010024  | 2850 | 0.00097447 |
| 1914 | 0.00061555 | 2100 | 0.00056241 | 2282 | 0.00066615 | 2464 | 0.0018258  | 2663 | 0.0011011  | 2851 | 0.00065799 |
| 1915 | 0.00082031 | 2101 | 0.0011257  | 2283 | 0.00067304 | 2465 | 0.00099569 | 2664 | 0.00077605 | 2852 | 0.0010292  |
| 1916 | 0.00070949 | 2102 | 0.00093928 | 2284 | 0.00079564 | 2466 | 0.002283   | 2665 | 0.0012229  | 2853 | 0.001222   |
| 1917 | 0.00090918 | 2103 | 0.001069   | 2285 | 0.0010227  | 2467 | 0.0010992  | 2666 | 0.00098245 | 2854 | 0.00069861 |
| 1918 | 0.00067377 | 2104 | 0.00046066 | 2286 | 0.00095524 | 2468 | 0.0013     | 2667 | 0.0012237  | 2855 | 0.0012228  |
| 1919 | 0.00061446 | 2105 | 0.00072346 | 2287 | 0.00050673 | 2469 | 0.0008943  | 2668 | 0.00082394 | 2856 | 0.00029653 |
| 1920 | 0.00060213 | 2106 | 0.00071911 | 2288 | 0.0013655  | 2470 | 0.00069898 | 2669 | 0.0011616  | 2857 | 0.0004846  |
| 1921 | 0.00075991 | 2107 | 0.0011381  | 2289 | 0.00086402 | 2471 | 0.00052704 | 2670 | 0.00077896 | 2858 | 0.00067304 |

|      |            |      |            |      |            |      |            |      |            |      |            |
|------|------------|------|------------|------|------------|------|------------|------|------------|------|------------|
| 1922 | 0.00063387 | 2108 | 0.00076898 | 2290 | 0.0006433  | 2472 | 0.0011475  | 2671 | 0.0011234  | 2859 | 0.00044597 |
| 1923 | 0.00063786 | 2109 | 0.00095742 | 2291 | 0.0011281  | 2473 | 0.00071711 | 2672 | 0.0010797  | 2860 | 0.00061065 |
| 1924 | 0.0010664  | 2110 | 0.00090156 | 2292 | 0.0011772  | 2474 | 0.0007668  | 2673 | 0.0005265  | 2861 | 0.0010737  |
| 1925 | 0.0009527  | 2111 | 0.000652   | 2293 | 0.00052505 | 2475 | 0.00081759 | 2674 | 0.0013555  | 2862 | 0.00071385 |
| 1926 | 0.00096739 | 2112 | 0.00030415 | 2294 | 0.0010521  | 2476 | 0.00066452 | 2675 | 0.00094944 | 2863 | 0.00049911 |
| 1927 | 0.00066198 | 2113 | 0.00088161 | 2295 | 0.0011725  | 2477 | 0.00096939 | 2676 | 0.0015566  | 2864 | 0.0011007  |
| 1928 | 0.0010249  | 2114 | 0.0011562  | 2296 | 0.0011714  | 2478 | 0.0027422  | 2677 | 0.0012148  | 2865 | 0.00085948 |
| 1929 | 0.0011172  | 2115 | 0.00056622 | 2297 | 0.00070968 | 2479 | 0.0033993  | 2678 | 0.00099804 | 2866 | 0.0010914  |
| 1930 | 0.00049821 | 2116 | 0.0003192  | 2298 | 0.0009206  | 2480 | 0.0015053  | 2679 | 0.0011986  | 2867 | 0.0007425  |
| 1931 | 0.00086474 | 2117 | 0.00048279 | 2299 | 0.00079419 | 2481 | 0.00095832 | 2680 | 0.00091897 | 2868 | 0.0007396  |
| 1932 | 0.00042729 | 2118 | 0.00022416 | 2300 | 0.00065726 | 2482 | 0.0011177  | 2681 | 0.00073434 | 2869 | 0.00095814 |
| 1933 | 0.00070841 | 2119 | 0.00036309 | 2301 | 0.00074939 | 2485 | 0.0007075  | 2682 | 0.00068864 | 2870 | 0.0010303  |
| 1934 | 0.00068809 | 2120 | 0.0010577  | 2302 | 0.00090228 | 2486 | 0.00077098 | 2683 | 0.00087018 | 2871 | 0.00074849 |
| 1935 | 0.00038304 | 2121 | 0.0012004  | 2303 | 0.00065128 | 2489 | 0.0013898  | 2685 | 0.00058816 | 3007 | 0.00048261 |
| 1936 | 0.00086819 | 2122 | 0.00072165 | 2304 | 0.00067866 | 2490 | 0.00082194 | 2686 | 0.00070641 | 3008 | 0.00062244 |
| 1937 | 0.0009741  | 2123 | 0.00096286 | 2305 | 0.00085712 | 2491 | 0.0011901  | 2687 | 0.001232   | 3009 | 0.0007717  |
| 1938 | 0.0013238  | 2124 | 0.00079709 | 2306 | 0.00091444 | 2492 | 0.00067667 | 2688 | 0.00080181 | 3010 | 0.00042203 |
| 1939 | 0.001106   | 2125 | 0.00046774 | 2307 | 0.00017955 | 2493 | 0.00067413 | 2689 | 0.0008593  | 3011 | 0.00088378 |
| 1940 | 0.00044398 | 2126 | 0.00098462 | 2308 | 0.00084243 | 2496 | 0.00092731 | 2690 | 0.0009177  | 3012 | 0.0006277  |
| 1941 | 0.0026599  | 2127 | 0.0011671  | 2309 | 0.001006   | 2497 | 0.00099224 | 2691 | 0.00091153 | 3013 | 0.00088868 |
| 1942 | 0.0012913  | 2128 | 0.0011118  | 2310 | 0.00096957 | 2498 | 0.00074087 | 2692 | 0.00082212 | 3014 | 0.00063767 |
| 1943 | 0.00029998 | 2129 | 0.0010813  | 2311 | 0.00094781 | 2499 | 0.0012815  | 2693 | 0.0013341  | 3015 | 0.001146   |
| 1944 | 0.00042548 | 2130 | 0.00050455 | 2312 | 0.00050002 | 2500 | 0.00092876 | 2694 | 0.0011413  | 3016 | 0.0011613  |
| 1945 | 0.0010581  | 2131 | 0.0010015  | 2313 | 0.00099986 | 2501 | 0.00070151 | 2695 | 0.00092477 | 3017 | 0.0007338  |
| 1946 | 0.00060503 | 2132 | 0.00059578 | 2314 | 0.00088886 | 2502 | 0.0013444  | 2696 | 0.0013602  | 3018 | 0.00046139 |
| 1947 | 0.00059088 | 2133 | 0.0009333  | 2315 | 0.00056549 | 2503 | 0.0024522  | 2697 | 0.0012434  | 3019 | 0.00056694 |
| 1948 | 0.00085114 | 2134 | 0.0011468  | 2316 | 0.00079981 | 2504 | 0.00047336 | 2698 | 0.00093602 | 3020 | 0.00030596 |
| 1949 | 0.00055715 | 2135 | 0.00060866 | 2317 | 0.00094763 | 2505 | 0.0015634  | 2699 | 0.00085785 | 3021 | 0.00041895 |
| 1950 | 0.00050727 | 2136 | 0.0010622  | 2318 | 0.00098934 | 2506 | 0.00097628 | 2700 | 0.00097537 | 3022 | 0.00051362 |
| 1951 | 0.00072963 | 2137 | 0.0005421  | 2319 | 0.00082883 | 2507 | 0.0013434  | 2701 | 0.00057946 | 3023 | 0.00027712 |
| 1952 | 0.00075756 | 2138 | 0.0003056  | 2320 | 0.00087671 | 2508 | 0.00047245 | 2702 | 0.00084515 | 3024 | 0.00062933 |
| 1953 | 0.00073162 | 2139 | 0.001215   | 2321 | 0.00087345 | 2509 | 0.0011034  | 2703 | 0.00079056 | 3025 | 0.00045994 |
| 1954 | 0.00079945 | 2140 | 0.00058617 | 2322 | 0.001292   | 2511 | 0.0014872  | 2704 | 0.00072618 | 3026 | 0.00047989 |
| 1955 | 0.0010893  | 2141 | 0.0006384  | 2324 | 0.00063387 | 2512 | 0.0007873  | 2705 | 0.0014219  | 3027 | 0.00074178 |
| 1956 | 0.001144   | 2142 | 0.0010731  | 2325 | 0.00079365 | 2513 | 0.001      | 2706 | 0.00057801 | 3028 | 0.00091643 |
| 1957 | 0.00061156 | 2143 | 0.0012857  | 2326 | 0.00092514 | 2514 | 0.0011489  | 2707 | 0.0012413  | 3029 | 0.00066978 |
| 1958 | 0.00079981 | 2144 | 0.00065944 | 2327 | 0.0012744  | 2515 | 0.0011707  | 2708 | 0.00055225 | 3030 | 0.0012247  |
| 1959 | 0.00051018 | 2145 | 0.0013274  | 2328 | 0.0010216  | 2516 | 0.00084407 | 2709 | 0.00044235 | 3031 | 0.00082176 |
| 1960 | 0.00047771 | 2146 | 0.0012144  | 2329 | 0.0010466  | 2517 | 0.0014032  | 2710 | 0.00089485 | 3032 | 0.0011098  |
| 1961 | 0.00074885 | 2147 | 0.001051   | 2330 | 0.0012113  | 2518 | 0.0010209  | 2711 | 0.00056876 | 3033 | 0.00055878 |
| 1962 | 0.00067467 | 2148 | 0.00051217 | 2331 | 0.0011266  | 2519 | 0.0023583  | 2712 | 0.00064928 | 3034 | 0.0015585  |
| 1963 | 0.00071965 | 2149 | 0.00092387 | 2332 | 0.00099768 | 2520 | 0.00075084 | 2713 | 0.00058435 | 3035 | 0.00050038 |

|      |            |      |            |      |            |      |            |      |            |      |            |
|------|------------|------|------------|------|------------|------|------------|------|------------|------|------------|
| 1964 | 0.00048479 | 2150 | 0.00084098 | 2333 | 0.0013334  | 2521 | 0.0010902  | 2714 | 0.00072727 | 3036 | 0.00086438 |
| 1965 | 0.00090664 | 2151 | 0.00089721 | 2334 | 0.00089866 | 2522 | 0.00058181 | 2715 | 0.0012773  | 3037 | 0.00060666 |
| 1966 | 0.00056839 | 2152 | 0.0010305  | 2335 | 0.00056477 | 2523 | 0.0015224  | 2716 | 0.000615   | 3038 | 0.00079546 |
| 1967 | 0.00052795 | 2153 | 0.00061065 | 2336 | 0.0006647  | 2524 | 0.00099641 | 2717 | 0.0010847  | 3039 | 0.00083971 |
| 1968 | 0.00067286 | 2154 | 0.0010104  | 2337 | 0.00085114 | 2525 | 0.00068646 | 2718 | 0.0013697  | 3040 | 0.0012906  |
| 1969 | 0.0010017  | 2155 | 0.00092695 | 2338 | 0.0011277  | 2526 | 0.00043418 | 2719 | 0.00087617 | 3041 | 0.00076626 |
| 1970 | 0.00060485 | 2156 | 0.00087363 | 2339 | 0.00097809 | 2527 | 0.00091697 | 2720 | 0.00099949 | 3042 | 0.002273   |
| 1971 | 0.0012231  | 2157 | 0.0010129  | 2340 | 0.0010392  | 2528 | 0.0013339  | 2721 | 0.0011878  | 3043 | 0.0011134  |
| 1972 | 0.00095379 | 2158 | 0.0012445  | 2341 | 0.00054119 | 2529 | 0.0008963  | 2722 | 0.0010439  | 3044 | 0.00067667 |
| 1973 | 0.00092931 | 2159 | 0.0012367  | 2342 | 0.0011607  | 2530 | 0.0011237  | 2723 | 0.00084588 | 1875 | 0.00011372 |
| 1974 | 0.00059922 | 2160 | 0.0012507  | 2343 | 0.0011201  | 2531 | 0.00068628 | 2724 | 0.0010508  | 1985 | 0.0010632  |
| 1975 | 0.00094182 | 2161 | 0.00070242 | 2344 | 0.00088415 | 2532 | 0.0005936  | 2725 | 0.0013941  | 2036 | 0.00050727 |
| 1976 | 0.00082121 | 2162 | 0.00067086 | 2345 | 0.00062861 | 2533 | 0.00092278 | 2726 | 0.00097465 | 2323 | 0.00090845 |
| 1977 | 0.0010537  | 2163 | 0.0010209  | 2346 | 0.0014545  | 2534 | 0.0010584  | 2727 | 0.00090156 | 2483 | 0.0011899  |
| 1978 | 0.001209   | 2164 | 0.00098154 | 2347 | 0.0013299  | 2535 | 0.0017211  | 2728 | 0.0011245  | 2484 | 0.0010145  |
| 1979 | 0.0011138  | 2165 | 0.0010893  | 2348 | 0.0018472  | 2536 | 0.0011823  | 2729 | 0.00080961 | 2487 | 0.00072346 |
| 1980 | 0.00032228 | 2166 | 0.00051163 | 2349 | 0.00086801 | 2537 | 0.00088923 | 2730 | 0.00124    | 2488 | 0.0012331  |
| 1981 | 0.00056876 | 2167 | 0.00081251 | 2350 | 0.0007055  | 2538 | 0.00096776 | 2731 | 0.0011649  | 2494 | 0.00068882 |
| 1982 | 0.00027585 | 2168 | 0.00093021 | 2351 | 0.0012607  | 2539 | 0.00078186 | 2732 | 0.0012766  | 2495 | 0.00080271 |
| 1983 | 0.00078422 |      |            |      |            |      |            |      |            |      |            |

## References

- Haber, M. J., D. K. Shay, X. M. Davis, R. Patel, X. Jin, E. Weintraub, E. Orenstein, W. W. Thompson. 2007. Effectiveness of interventions to reduce contact rates during a simulated influenza pandemic. *Emerging Infectious Disease* **13**(4) 581–589.
- Statistics Canada. 2006a. Census 2006. Retrieved November 17, 2010, <http://www12.statcan.ca/census-recensement/2006/rt-td/index-eng.cfm>.
